## Sp1 and Sp3 Transcription Factors Mediate Leptin-Induced Collagen $\alpha_1(I)$ Gene Expression in Primary Culture of Male Rat Hepatic Stellate Cells

Inmaculada García-Ruiz, Erica Gómez-Izquierdo, Teresa Díaz-Sanjuán, Montserrat Grau, Pablo Solís-Muñoz, Teresa Muñoz-Yagüe, and José A. Solís-Herruzo

Research Institute (I.G-R., R.G-I., T.D-S., M.G., T.M-Y., J.A.S-H.), University Hospital "12 de Octubre," School of Medicine, Universidad Complutense, 28041 Madrid, Spain; and Institute of Liver Studies (P.S-M.), King's College Hospital, London SE5 9RS, United Kingdom

Mechanisms by which leptin stimulates collagen  $\alpha_1(I)$  [*Col1a(I)*] gene expression are unclear. The purposes of this study were to identify the *trans*-acting factors and *cis*-acting elements in *Col1a(I)* promoter involved in this effect as well as the pathways that are implicated. In primary cultures of rat hepatic stellate cells (HSCs), we measured the effects of leptin on *Col1a(I)* gene and protein expression and on the binding of nuclear proteins to the *Col1a(I)* promoter. We found that leptin increased *Col1a(I)* gene and protein expression in activated HSCs. Transient transfections showed that leptin exerted its effects through elements located between -220 and -112 bp of the *Col1a(I)* promoter. Gel retardation assays demonstrated that leptin induced the binding of transcription factors specific protein (Sp)-1 and Sp3 to two elements located between -161 and -110 bp of the *Col1a(I)* promoter. Leptin-induced Sp1/Sp3 phosphorylation, but this effect was suppressed by inhibiting or silencing Janus kinase-2, phosphatidylinositol-3-kinase, nonphagocytic adenine dinucleotide phosphate (NADPH) oxidase, or ERK1/2, by the use of antioxidants or catalase, or by preventing protein-aldehyde adduct formation. Leptin provoked oxidative stress, aldehyde-protein adduct formation, and increased gene expression of some components of the NADPH oxidase complex. In conclusion, in HSCs, leptin up-regulates *Col1a(I)* gene expression after activating NADPH oxidase, inducing oxidative stress, aldehyde-protein adduct formation, and ERK1/2 phosphorylation, which in turn activates Sp1/Sp3 and provokes the binding of these two factors to regulatory elements located between -161 and -110 bp of the *Col1a(I)* promoter. These findings may contribute to a better understanding of mechanisms involved in the leptin-induced liver fibrosis. (*Endocrinology* 153: 5845–5856, 2012)

Leptin is a 16-kDa nonglycosylated peptide and adipocyte-derived hormone that regulates food intake and energy expenditure (1). Absence of leptin is associated with a massive increase in body fat (2). Apart from its effects on energy homeostasis, leptin is a pleiotropic molecule that is also involved in many other biological effects including wound repair and extracellular matrix production (3). Fibrosis caused by liver injury is markedly diminished in animals deficient in leptin or leptin-receptors (4, 5). By contrast, leptin increases hepatic fibrosis induced by tioacetamide administration (6). On the other hand, leptin

has shown to be a stimulatory factor for collagen gene expression and collagen protein production (7, 8); therefore, leptin is a profibrogenic hormone that may play a role in the development of liver fibrosis. However, intracellular

Abbreviations: AP2, Activator protein 2; CAT, chloramphenicol acetyltransferase; c-Krox, Krueppel-related zinc finger protein; Col1a(I), collagen  $\alpha_1(I)$ ; DNase, deoxyribonuclease; DPI, diphenylene-iodonium; FP1, footprinting-1 containing sequences between -103 bp and -82 bp of the *Col1a(I)* promoter; FP2, footprinting-2 containing sequences between -130 bp and -112 bp of the *Col1a(I)* promoter; FP3, footprinting-3 containing sequences between -161 bp and -133 bp of the *Col1a(I)* promoter; FP4, footprinting-4 containing sequences between -190 bp and -170 bp of the *Col1a(I)* promoter; GAPDH, glyceraldehyde-3-phosphate dehydrogenase; HSC, hepatic stellate cell; Jak2, Janus kinase-2; JNK, Jun-N-terminal kinase; NADPH, nicotinamide adenine dinucleotide phosphate; NF1, nuclear factor 1; NOX2, NADPH oxidase 2; ObRb, long form of leptin receptor; PD098059, 2'-amino-3'-methoxyflavone; pHMB, parahydroxymercuribenzoate; PI3K, phosphatidylinositol-3-kinase; P5P, pyridoxal-5-phosphate; RAC1, Rho-related C3 botulinum toxin substrate; SB203580, 4-(4-fluorophenyl)-2-(4-methylsulfonylphenyl)-5-(4-pyridyl)1H-imidazole; siRNA, small interfering RNA; Sp, specific protein; Stat3, signal transducer and activator of transcription protein-3; TBARS, thiobarbituric acid-reacting substances; Zf9, zinc finger transcription factor 9.

ISSN Print 0013-7227 ISSN Online 1945-7170

Printed in U.S.A.

Copyright © 2012 by The Endocrine Society

doi: 10.1210/en.2012-1626 Received June 12, 2012. Accepted September 24, 2012.

First Published Online October 23, 2012

mechanisms and collagen gene elements by which leptin induces fibrosis are partially unknown. Leptin exerts its actions through signaling pathways upon its binding and activation of the long form of leptin receptor (ObRb), which in turn activates Janus kinase-2 (Jak2)/signal transducer and activator of transcription protein-3 (Stat3) pathway, translocates phosphorylated Stat3 into the nucleus and regulates activity of target gene promoter (9). The specific transcriptional factors required for leptin-induced activation of the collagen promoter and the specific sites on this promoter that are critical for this activation in humans remain to be elucidated. In fact, collagen  $\alpha 1(I)$  [*Col1a(I)*] promoter lacks Stat3 consensus binding sites. Some studies have suggested that oxidative stress may mediate these effects of leptin. Thus, in a number of cell types, leptin produces reactive oxygen species, likely with the contribution of the nonphagocytic adenine dinucleotide phosphate (NADPH) oxidase (10). In previous studies, we have shown that oxidative stress induces *Col1a(I)* gene expression by the mediation of aldehyde-protein adducts and transcription factors specific protein (Sp)-1 and Sp3 acting on *Col1a(I)* promoter (11, 12).

The aims of this study were the following: 1) to determine the effect of leptin on collagen production in primary culture of hepatic stellate cells (HSCs), 2) to recognize the *trans*-acting factors and *cis*-acting elements in *Col1a(I)* promoter involved in this effect, and 3) to identify the intracellular pathways used by leptin to induce *Col1a(I)* gene expression.

## Materials and Methods

### HSC isolation and culture

HSCs were isolated from adult male Sprague Dawley rats as described by Rippe *et al.* (13). All procedures were carried out in accordance with the Spanish Guidelines for the Care and Use of Laboratory Animals. The purity of HSC cultures was tested by flow cytometry at d 2 and 12. This study showed that at d 2 most isolated cells were reelin positive or glial fibrillary acidic protein positive, and only a minority of them were smooth muscle actin positive, fibulin-2 positive (14). Cells were cultured as described elsewhere (12). At d 12 of culture, 98% of cells were reelin and smooth muscle actin positive, and less than 2% were ectodermal dysplasia 1 and 2 positive, two macrophage markers (BioNova Científica SL, Madrid, Spain). After an activation period of 12–14 d in culture, the effect of leptin (recombinant rat leptin; MBL International Corp., Woburn, MA) was examined by the addition of this peptide to cells cultured in serum-free medium overnight.

### Quantitative RT-PCR

Gene expression of *Col1a(I)*, *TGF $\beta$ 1*, *Sp1*, NADPH oxidase components [*p47<sup>phox</sup>*, *p22<sup>phox</sup>*, NADPH oxidase 2 (NOX2), and Rho-related C3 botulinum toxin substrate (RAC1)], *ERK1*, and *ERK2* were measured by quantitative

RT-PCR as described elsewhere (15). Sequences of primers used in these experiments are shown in Supplemental Table 1, published on The Endocrine Society's Journals Online web site at <http://endo.endojournals.org>.

### Northern blots

On some occasions, *Col1a(I)* gene expression was also evaluated by Northern blot as previously described (14).

### Reverse transcription-polymerase chain reaction

Gene expression of the long forms of leptin receptor (ObRb) was assessed by RT-PCR. cDNA synthesis and predenaturation were at 42 C for 60 min followed by 94 C for 10 min. PCR amplification sequence was performed for 35 cycles at 94 C for 30 sec, 57 C for 30 sec, and 72 C for 1 min. After amplification, each sample was applied to 1.2% agarose/ethidium bromide gel. The resolved PCR products were photographed under UV illumination.

### Immunoprecipitation

The immunoprecipitation assays were performed as previously described (16). Cellular proteins were precipitated with polyclonal antibodies against Sp1 or Sp3 (Santa Cruz Biotechnology, Santa Cruz, CA). Immune complexes were recognized by Western blot using specific antibodies against Sp1/Sp3 and antiphosphoserine (Santa Cruz Biotechnology).

### Western blot analysis

Cell culture serum-free media were collected and proteins were extracted from the media as described elsewhere (17). The filters containing proteins were incubated with appropriated polyclonal antibodies [*Col1a(I)*, Sp1, Sp3, ERK1/2, phosphoserine, phosphor-Sp1,  $\beta$ -actin, glyceraldehyde-3-phosphate dehydrogenase (GAPDH)] (Santa Fe Biotechnology, Santa Fe, CA).

### Plasmids

The p(-3700)ColCAT, p(-905)ColCAT, and p(-220)ColCAT (18) constructs contain the *XbaI-XbaI* (nucleotides -3700 to +116), the *Pvu2-XbaI* (nucleotides -905 to +116), or the *BglII-XbaI* (nucleotides -220 to +116) fragment, respectively, and the 5' untranslated region of the first exon of the *Col1a(I)* gene fused to the bacterial chloramphenicol acetyltransferase (CAT) gene. The vector plasmid pUCCAT, also containing the CAT gene, was obtained by digesting p(-3700)ColCAT with *XbaI*, removing the *XbaI-XbaI* fragment and ligating both ends.

### Transient transfection and chloramphenicol acetyltransferase (CAT) assay

In general,  $5 \times 10^6$  HSCs were transiently transfected before confluence by the LipofectAMINE technique (Invitrogen, Carlsbad, CA) (17). Cell lysates were prepared, and CAT activity was determined as described elsewhere (19). Luciferase activity was determined using the enhanced luciferase assay kit according to the manufacturer's protocol (Analytical Luminiscence, San Diego, CA). Cell lysates were prepared in 125  $\mu$ l of cell lysis buffer. Luciferase activity was determined using 50  $\mu$ l aliquots, and protein concentrations determined with 5- $\mu$ g aliquots using the Bradford protein assay (Bio-Rad Laboratories, Hercules, CA) (20). All reporter genes were normalized for transfection effi-

ciency by cotransfecting a constant amount of the *pRSVβ-gal* reporter gene and determining β-galactosidase activity (21).

### Preparation of nuclear extracts and gel retardation assays

Extraction of nuclear proteins from untreated and treated HSCs, measurement of protein concentration, and gel retardation assays were performed as described elsewhere (17). The oligonucleotides used in these assays are shown in Supplemental Table 1. For competition experiments, 200-fold appropriated, unlabeled, annealed oligonucleotides were added to binding reactions. Supershift assays were performed as a standard mobility shift assay, except that 3 μl (200 μg per 0.1 ml) specific polyclonal antisera raised against Sp1, Sp3, nuclear factor 1 (NF1), activator protein 2 (AP2), Krueppel-related zinc finger protein (c-Krox), and Zinc finger transcription factor-9 (Zf9) was added to the binding reaction for 1 h at 4 C. Gel retardation assays were also performed using cells with silenced NOX2, RAC1, ERK1, or ERK2.

### Determination of lipid peroxides in cells

Lipid peroxidation was determined by measuring thiobarbituric acid-reacting substances (TBARS) in cells as described previously (11). The TBARS were measured by spectrophotometry (absorbance, 532 nm) using tetramethoxypropane standards.

### Measurement of cellular glutathione

We determined total cellular glutathione using the modification of Eady *et al.* (22) of Tietze's assay as described elsewhere (11).

Determination of aldehyde-protein adducts was done using the OxiSelect 4-hydroxynonenal adduct ELISA kit (Cell Biolabs, Inc., San Diego, CA) according to the manufacturer's protocol.

### RNA interference

Silencing RNAs for NOX2, RAC1, p47<sup>phox</sup>, ERK1, ERK2, and nonspecific control RNA used as negative control were purchased from Santa Cruz Biotechnology. For the transfection experiments, we followed the procedure described elsewhere (14).

### Statistical analysis

All experiments were repeated at least three times, and RT-PCR and luciferase analysis as well as TBARS and glutathione determinations were done by quintuplicate. Histograms are expressed as mean ± SD. A Student's *t* test was used to evaluate the difference of means between groups, accepting that a *P* < 0.05 was considered to be significant.

## Results

### Leptin induces *Col1a(I)* gene expression in primary culture of HSCs

Because the long-form of the leptin receptor (ObRb) is essential for signal transduction, we determined whether the primary culture of HSCs we used in our experiments express then *ObRb* gene and how this expression progresses during the activation of these cells. As Fig. 1A shows, ObRb cDNA is present in trace quantities in resting

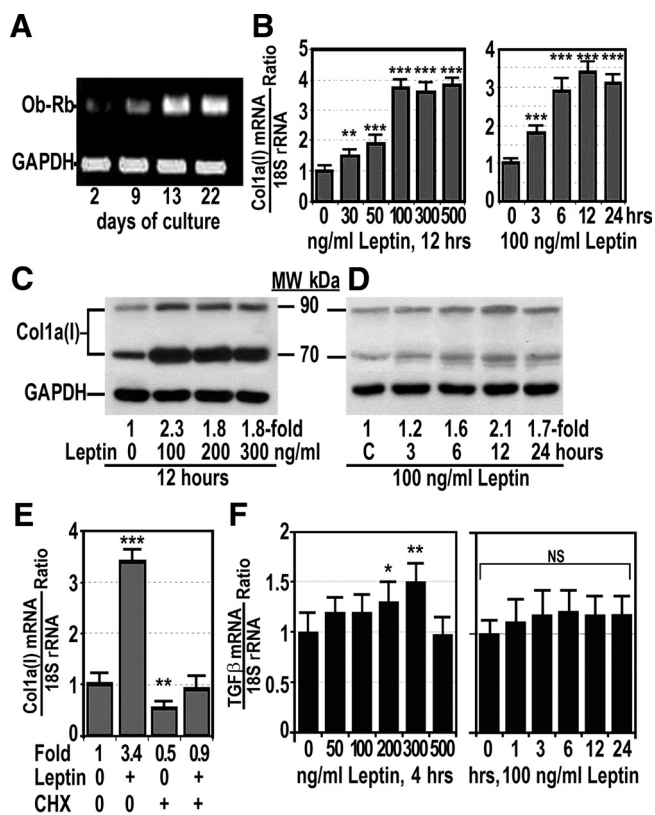

**FIG. 1.** Leptin increases collagen gene (B) and protein (C and D) expression in primary cultures of rat HSCs. A, RT-PCR showing that leptin receptor *ObRb* gene expression increases during activation of HSCs in primary cultures. B, Dose- and time-response effects of leptin on collagen  $\alpha 1(I)$  gene expression [*Col1a(I)* mRNA to 18S rRNA ratio] (quantitative RT-PCR). C and D, Dose- (C) and time-response (D) effects of increasing dosage of leptin on collagen  $\alpha 1(I)$  [*Col1a(I)*] protein production normalized to GAPDH content (Western blots). E, Pretreatment of cells with 0.1 mM cycloheximide (CHX) for 1 h abrogates the effect of leptin on *Col1a(I)* gene expression (RT-PCR). F, Time- and dose-response effects of leptin on *TGFβ1* gene expression (RT-PCR). Results of RT-PCR studies are representative of three separated experiments that were done by quintuplicate. Data are shown as mean ± SD. \*, *P* < 0.05; \*\*, *P* < 0.01; \*\*\*, *P* < 0.001.

HSCs, but its amount increases markedly as the cells become active between d 9 and 22 of culture.

Treatment of cells with various concentrations of leptin led to a significant dose- and time-dependent increase in the level of *Col1a(I)* mRNA without change in the 18S rRNA. This effect was maximal by treating cells with 100 ng/ml leptin for 12 h (Fig. 1B). Similar results were obtained when *Col1a(I)* protein production was measured by Western blotting in culture media of leptin-treated HSCs (Fig. 1, C and D). The effect of leptin on collagen gene expression was prevented by blocking protein synthesis with 0.1 mM cycloheximide for 1 h before the addition of leptin (Fig. 1E). Because the effects of leptin on collagen gene expression have been suggested to be mediated by *TGFβ1* (23), we determined the effect of leptin on the *TGFβ1* gene expression in primary culture of HSCs. As

shown in Fig. 1F, *TGFβ1* gene expression did not increase significantly in cells treated with 100 ng/ml leptin.

### Treatment of HSCs with leptin activates *Col1a(I)* gene expression acting through an element located between –220 bp and –111 bp of the *Col1a(I)* promoter

Addition of 100 ng/ml leptin to confluent HSCs transiently transfected with a reporter CAT plasmid driven by the whole *Col1a(I)* promoter [p(–3700)ColCAT] resulted in a  $2.9 \pm 0.15$ -fold increase in the CAT activity at 12 h (Fig. 2A). This effect was maximal at the dose of 100 ng/ml leptin (Fig. 2B). Deletion of promoter sequences upstream of –220 bp relative to the transcription start site did not abrogate the stimulatory effect of leptin on *Col1a(I)* gene expression (Fig. 2C). By contrast, the effect of leptin did not occur in cells transfected with the construct p(–111)ColCAT, which lacks sequences upstream

of –110 bp (Fig. 2D), suggesting that the leptin-responsive element is located in sequences between –220 and –111 bp relative to the transcription start site of the *Col1a(I)* promoter.

### Leptin induces the interaction of *trans*-acting factors Sp1 and Sp3 with footprinting-2 containing sequences (FP2) (–129 to –110 bp) and footprinting-3 containing sequences (FP3) (–161 to –133 bp) of the *Col1a(I)* promoter

Because the 220-bp upstream of the transcription start point in the *Col1a(I)* promoter contains four regions protected from deoxyribonuclease (DNase) I digestion by nuclear proteins from a number of cell types, including HSCs (13, 24, 25), we studied whether treatment of HSCs with 100 ng/ml leptin induced any change in the binding of nuclear proteins to these elements. Gel retardation experiments showed that incubation of a <sup>32</sup>P-radiolabeled oligonucleotide containing sequences between –103 bp and –82 bp [footprinting-1 containing sequences (FP1)] (CTGATTGGCTGGGGCCGGGCT) of the *Col1a(I)* promoter with nuclear proteins extracted from cells untreated or treated with 100 ng/ml leptin for 6 and 12 h led to the formation of two major specific DNA-protein complexes (Fig. 3A). However, treatment of cells with leptin induced little changes in the pattern or intensity of the retarded bands. Thus, these results indicate that leptin does not influence the interaction of nuclear proteins with the FP1 sequence in HSCs.

To examine the effect of leptin on the interaction of nuclear proteins with the element extending from –130 bp to –112 bp (FP2) (CCAAATTGGGGCCGGGCC) of the *Col1a(I)* promoter, we performed DNA mobility shift assays using as a probe a <sup>32</sup>P-radiolabeled oligonucleotide containing the sequence of FP2 region. As Fig. 3B shows, incubation of this probe with nuclear proteins extracted from HSCs also leads to the formation of two specific DNA-protein complexes. However, the intensity of these bands was clearly more pronounced when nuclear extracts were prepared from cells treated with 100 ng/ml leptin for 3–8 h (Fig. 3B). The formation of these complexes was specific because a 200-fold molar excess of the same unlabeled oligonucleotide inhibited these bindings in a competition assay (Fig. 3B, line Comp, lane FP2).

Because it has been shown that the *trans*-acting factor Sp1 interacts with this footprinted region in fibroblasts and HSCs (11, 12, 26), we performed supershift assays including a Sp1 specific polyclonal antibody in the binding reaction. This incubation led to the formation of a supershifted complex (Fig. 3B) that was associated with a decrease in the intensity of the upper band. In an attempt to identify other nuclear factors bound to FP2, supershift

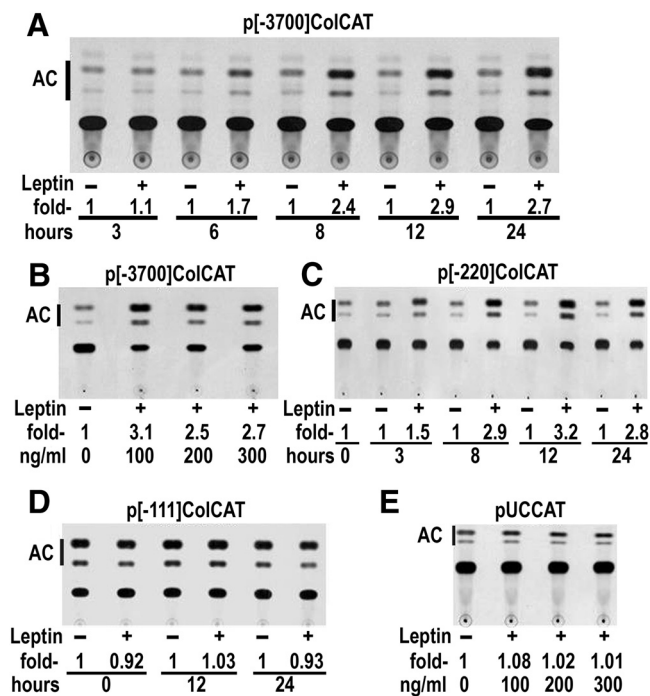

**FIG. 2.** Leptin stimulates *Col1a(I)* gene expression acting on elements located between –220 and –111 bp relative to the transcription start site. HSCs were transiently cotransfected by the LipofectAMINE technique (Invitrogen) with pRSVβ-gal plasmid and ColCAT constructs obtained by removing progressively more 5'-flanking sequences of the *Col1a(I)* promoter. Leptin (100 ng/ml) was added to confluent cells after 12 h of starvation, and this treatment was maintained for another 24 h. Cell lysates were assayed for CAT and β-galactosidase activities. Panels show the effect of leptin on the CAT activity of the lysate from cells transfected with p(–3700)ColCAT (A and B), p(–220)ColCAT (C), p(–111)ColCAT (D), or pUCCAT (E). Figures show representative results of three independent experiments. The CAT activity (normalized to β-galactosidase activity) in leptin-treated cells is expressed relative to the CAT activity in untreated cells. Leptin +, Experimental conditions in which leptin was added to the cells. Fold increase over the control levels. AC, Acetyl-[<sup>14</sup>C]chloramphenicol.

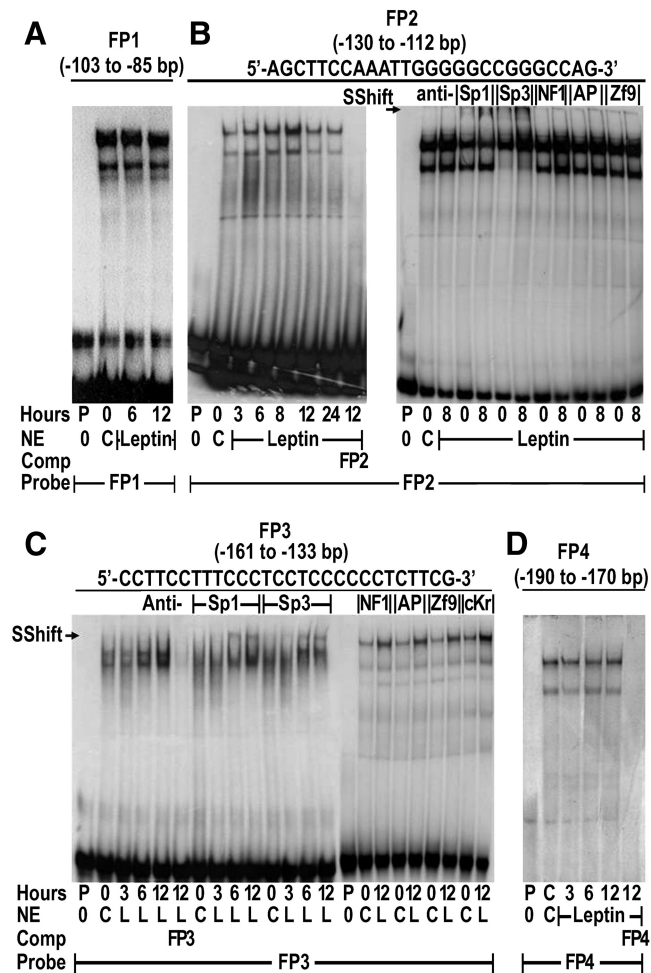

**FIG. 3.** Leptin increases the binding of Sp1 and Sp3 transcription factors to the *Col1a(I)* gene promoter. DNA binding was analyzed by gel retardation assays as described in *Materials and Methods*. Double-stranded oligonucleotides corresponding to the FP1 (–103 to –82 bp) (A), FP2 (–130 to –112 bp) (B), FP3 (–161 to 133 bp) (C), or FP4 (–190 to –170 bp) (D) of the *Col1a(I)* promoter were radiolabeled with  $^{32}\text{P}$  and incubated with 5  $\mu\text{g}$  nuclear protein extracts from confluent cells untreated or treated with 100 ng/ml leptin for the indicated time. Supershift assays were performed including in the binding reaction 3  $\mu\text{l}$  of specific antibodies against Sp1, Sp3, NF1, Zf9, AP2 (AP), or c-Krox (cKr) proteins. C, Control untreated cells; L, leptin-treated cells. NE, nuclear extract; Comp, competitor unlabeled oligonucleotides (lanes FP2, FP3, and FP4 in panels B, C, and D, respectively); SShift, supershifted proteins.

assays were also performed using polyclonal antisera against NF1, a CCAAT binding protein, Sp3, Zf9, and AP2, three GC-rich binding proteins. Although NF1, Zf9, and AP2 antibodies failed to supershift any band, Sp3 antiserum supershifted the lower band almost completely (Fig. 3B). The role played by FP2 in the leptin-induced up-regulation of *Col1a(I)* was confirmed in HSCs transfected with a ColCAT plasmid containing mutations at FP2. In these cells, leptin did not activate *Col1a(I)* gene expression (Supplemental Fig. 1).

Gel retardation experiments were also performed to analyze the effect of leptin on the interaction of nuclear

proteins with the third DNase I-protected region. Incubation of nuclear extracts from HSCs with a  $^{32}\text{P}$ -radiolabeled oligonucleotide containing the sequence spanning nucleotide –161 to –133 (FP3) (CCCTTCCTTCCCTCCTCCCCCTCTTCG) led to the formation of two major DNA-protein complexes, the intensity of which increased markedly with nuclear proteins extracted from cells treated with 100 ng/ml leptin for 3–12 h (Fig. 3C). Competition with a 200-fold molar excess of unlabeled FP3 oligonucleotide demonstrated the specificity of these complexes (Fig. 3C, line Comp, lane FP3). A supershift assay using Sp1 antibody resulted in the formation of a supershifted band and in a decrease in the intensity of the upper band (Fig. 3C). Likewise, the Sp3 antibody led to the complete disappearance of the lower complex and the formation of a supershifted band. The inclusion of antisera against NF-1, AP2, Zf9, or c-Krox transcription factors in the binding reaction failed to supershift any band (Fig. 3C).

Finally, gel retardation experiments using a  $^{32}\text{P}$ -radiolabeled oligonucleotide containing sequence spanning nucleotide –190 to –170 [footprinting-4 containing sequences (FP4)] (GGGAGGGGGGGCGCTGGGTGG) of the *Col1a(I)* promoter as a labeled probe also demonstrated two major complexes formed with nuclear extracts from HSCs. However, the pattern and the intensity of these complexes were not modified by the treatment of cells with 100 ng/ml leptin for 3–12 h (Fig. 3D).

### Leptin increases Sp1 gene expression and Sp1 phosphorylation in primary culture of HSCs

Because the preceding results indicated that leptin induced the binding of Sp1 and Sp3 to the *Col1a(I)* gene promoter, we wanted to know whether this binding is involved in the mediation of the effect of leptin on *Col1a(I)* gene expression. Therefore, we pretreated cells for 1 h with 0.1  $\mu\text{M}$  mithramycin, a drug that interferes with the binding of Sp proteins to DNA (27) (Fig. 4A) and determined its effects on leptin-induced *Col1a(I)* gene expression. As Fig. 4, B and C, shows, this pretreatment reduced the basal expression of *Col1a(I)* gene and abrogated the effect of leptin on this gene.

To corroborate that the stimulatory effect of leptin was mediated by the Sp1, we determined whether leptin also increases expression of other genes containing Sp1 binding sites. Therefore, we transiently transfected HSCs using either p $\Delta$ SLuc or p(–126)Luc reporter plasmids. Whereas the addition of 100 ng/ml leptin to HSCs transfected with p $\Delta$ SLuc, a deletion construct lacking Sp1 binding site, did not change significantly the expression of this gene, the addition of the same amount of leptin to HSCs transfected with p(–126)Luc, a plasmid containing two consensus

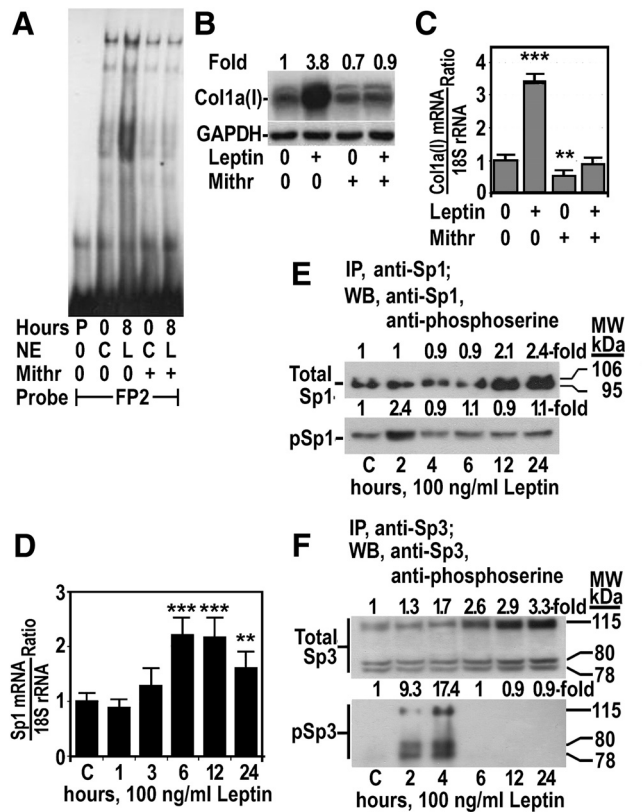

**FIG. 4.** Binding of Sp1 to FP2 mediates the leptin-induced increase in *Col1a(I)* gene expression. A, DNA binding was analyzed by gel retardation assays using a  $^{32}\text{P}$ -radiolabeled FP2 oligonucleotide as a probe. The HSCs were pretreated with 0.1  $\mu\text{M}$  mithramycin (Mithr) for 60 min and incubated for 8 h with (L) or without (C) 100 ng/ml leptin. NE, Nuclear extract. B and C, Effects of 100 ng/ml leptin on *Col1a(I)* gene expression in the absence or presence of 0.1  $\mu\text{M}$  mithramycin (Mithr). Gene expression was evaluated by Northern blotting (B) using GAPDH mRNA as a control for sample loading or by RT-PCR (C) measuring the *Col1a(I)* mRNA to 18S rRNA ratio. Blots are representative of three separate experiments. D, Time-response effects of 100 ng/ml leptin on *Sp1* gene expression. RT-PCR experiments were done by quintuplicate. Data are shown as mean  $\pm$  sd. \*\*,  $P < 0.01$ ; \*\*\*,  $P < 0.001$ . E and F, Effects of leptin on Sp1, phospho-Sp1 (pSp1) (E), Sp3, and phospho-Sp3 (pSp3) protein expression (F) in HSC lysates. Sp1 or Sp3 were immunoprecipitated as described in *Materials and Methods* and total Sp1, total Sp3, phospho-Sp1 (pSp1), and phospho-Sp3 (pSp3) were analyzed by Western blotting using, respectively, anti-Sp1, anti-Sp3, or antiphosphoserine. These results are representative of three independent experiments. IP, Immunoprecipitation. WB, Western blot.

Sp1 binding elements, resulted in a 4.2-fold increase in gene expression at 8 h (Supplemental Fig. 2).

Measurement of *Sp1* gene expression by quantitative RT-PCR and Sp1 protein content in immunoprecipitated proteins from cells treated with 100 ng/ml leptin for 1–24 h showed that leptin increased significantly *Sp1* gene expression between 6 and 12 h of treatment (Fig. 4D) and cellular Sp1 protein after 12 h (Fig. 4E). Likewise, leptin increased immunoprecipitated Sp3 after 6 h of treatment (Fig. 4F). Because phosphorylation of Sp proteins plays an important role in the regulation of target genes (28), we

determined the effect of leptin on serine phosphorylation of Sp1 and Sp3. As Fig. 4 shows, leptin transiently increased phospho-Sp1 and phospho-Sp3 2.4- and 17-fold above the baseline after 2 and 4 h, respectively, of treatment.

In an attempt to determine the kinase involved in Sp1 phosphorylation, Sp1 was immunoprecipitated from HSCs untreated or treated with 100 ng/ml leptin in the presence or absence of 50  $\mu\text{M}$  AG490, an inhibitor of JAK2; 50  $\mu\text{M}$  SP600125, a Jun-N terminal kinase (JNK) inhibitor; 0.1  $\mu\text{M}$  wortmannin, a phosphatidylinositol-3-kinase (PI3K) inhibitor; 1  $\mu\text{M}$  SB203580, an inhibitor of p38-MAPK; or 25  $\mu\text{M}$  PD098059, an ERK1/2 MAPK inhibitor. Likewise, we inhibited NADPH oxidase with 10  $\mu\text{M}$  of diphenylene-iodonium (DPI), the binding of Sp1 to the DNA with 0.1  $\mu\text{M}$  mithramycin, and reduced hydrogen peroxide with 1000 U/ml catalase. All these inhibitors were added to the cells 1 h before adding leptin. As Fig. 5A shows, leptin-induced Sp1 phosphorylation was suppressed by inhibiting JAK2, PI3K, ERK1/2, NADPH oxidase or by treating cells with catalase but not by blocking p38 MAPK, JNK, or the binding of Sp1. Likewise, inhibition of the same enzymes, including p38 MAPK and the Sp binding, prevented the leptin-induced *Col1a(I)* gene expression (Fig. 5B). The role played by ERK1/2 in mediating the effects of leptin on *Col1a(I)* gene expression was also confirmed by silencing these kinases with specific small interfering RNAs (Fig. 5B). Western blot using antiphosphorylated ERK1/2 demonstrated that leptin increased markedly ERK1/2 phosphorylation and that this effect was abolished, not only by their specific inhibitor, PD098059, but also by inhibiting JAK2, PI3K, or NADPH oxidase or by pretreating cells with catalase, suggesting that these enzymes and hydrogen peroxide are located upstream to ERK1/2 in the leptin signaling pathway (Fig. 5C).

### Collagen gene expression induced by leptin is mediated by oxidative stress

Treatment of HSCs with 100 ng/ml leptin for 1–12 h led to a marked increase in the cellular levels of TBARS (Fig. 6A), to a progressive decrease in the cellular content in reduced glutathione (Fig. 6B), two indexes of oxidative stress, and to a significant increase in the aldehyde-protein adduct formation, a consequence of the oxidative stress (29) (Fig. 6C). This leptin-induced adduct formation was avoided by treating cells not only with 100  $\mu\text{M}$  pyridoxal-5-phosphate (P5P), 4  $\mu\text{M}$  parahydroxymercuribenzoate (pHMB), or 10  $\mu\text{M}$  methylene blue, three inhibitors of aldehyde-protein adduct formation, but also with 1000 U/ml catalase, an enzyme that degrades hydrogen peroxide, and by inhibiting PI3K with 0.1  $\mu\text{M}$  wortmannin or

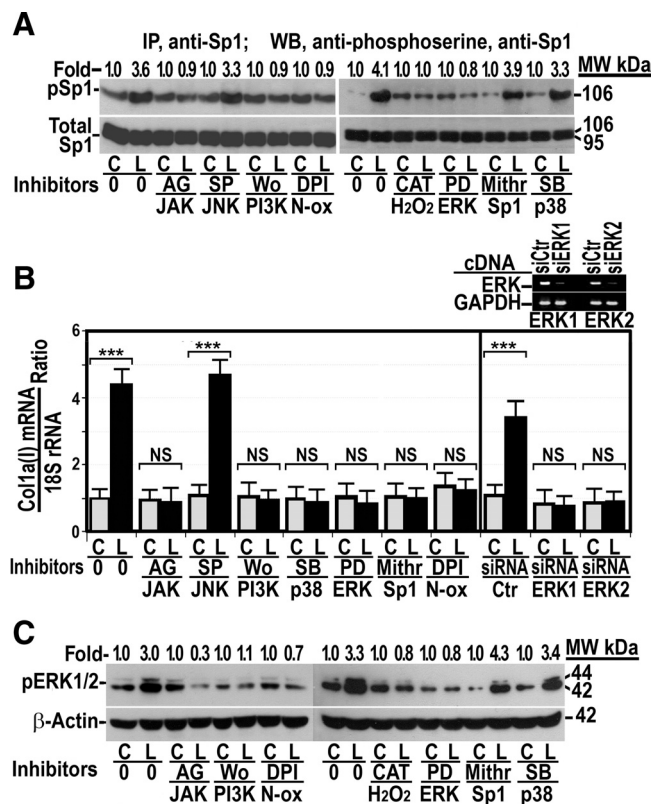

**FIG. 5.** Leptin-induced Sp1 phosphorylation is mediated by JAK2, PI3K, ERK1/2, and NADPH oxidase. **A**, HSCs were exposed to 100 ng/ml leptin for 120 min in the presence or absence of 1000 U/ml CAT or inhibitors of JAK2 (50  $\mu$ M AG490) (AG), JNK (50  $\mu$ M SP600125) (SP), PI3K (0.1  $\mu$ M wortmannin) (Wo), NADPH oxidase (N-ox) (10  $\mu$ M DPI, or p38 MAPK (1  $\mu$ M SB203580) (SB), ERK1/2 (25  $\mu$ M PD098059) (PD), or 0.1  $\mu$ M mithramycin (Mithr). Inhibitors were added to the cells 60 min before leptin. Cellular proteins (300  $\mu$ g) were immunoprecipitated using anti-Sp1 antibody and blotted for phosphoserine or Sp1 to evaluate equal loading. **B**, HSCs were exposed to 100 ng/ml leptin for 12 h in the presence or absence of catalase or inhibitors of JAK2 (AG), JNK (SP), PI3K (Wo), p38 (SB), ERK1/2 (PD), Sp1 (Mithr), or NADPH oxidase (N-ox) (DPI) as previously indicated. ERK1 and ERK2 RNAs were silenced using appropriated siRNAs as described under *Materials and Methods*. The [Col1a(I)]mRNA to 18S rRNA ratio was measured by RT-PCR. These results are representative of three separated experiments that were done by quintuplicate. \*\*\*,  $P < 0.001$ . NS, Not significant. This panel also shows RT-PCR-amplified cDNA fragments corresponding to ERK1, ERK2, and GAPDH. Expression of these genes was decreased by about 80% in cells with silenced genes. **C**, Effects of 100 ng/ml leptin for 120 min on ERK1/2 phosphorylation in the presence or absence of 1000 U/ml CAT or inhibitors of JAK2, PI3K, NADPH oxidase (N-ox), ERK1/2, Sp1, or p38 MAPK. Western blot was done using anti-ERK1/2 antibody and anti- $\beta$ -actin as loading control.

NADPH oxidase with 10  $\mu$ M DPI or 100  $\mu$ M apocynin. On the contrary, avoiding Sp binding with mithramycin, or suppressing ERK1/2 or p38 MAPK by pretreating cells with PD098059 or SB203580 did not decrease leptin-induced adduct formation (Fig. 6D).

The oxidative stress mediated the effects of leptin on *Col1a(I)* gene expression as indicated by the fact that these effects were prevented by preincubating cells for 60 min with three different antioxidants, namely, 2 mM glutathi-

one ethyl ester, a cell-permeable glutathione derivative; 1 mM melatonin, a well-known antioxidant; or 150  $\mu$ M 5,10,15,20-tetrakis (4-benzoic acid) porphyrin, an analog of the superoxide dismutase (Fig. 6E). This effect seems to be mediated by the formation of hydrogen peroxide and aldehyde-protein adducts because pretreated cells with 1000 U/ml catalase, 100  $\mu$ M P5P, 4  $\mu$ M pHMB, or 10  $\mu$ M methylene blue clearly abrogated the stimulatory effect of leptin on *Col1a(I)* gene expression (Fig. 6E). Finally, inhibition of NADPH oxidase with either 10  $\mu$ M DPI or 100  $\mu$ M apocynin also blocked the stimulatory effect of leptin on *Col1a(I)* gene expression (Fig. 6E), indicating that this enzyme is also implicated in the stimulatory effects of leptin on *Col1a(I)* gene expression.

To determine whether aldehyde-protein adduct formation are involved in the leptin-induced ERK1/2 phosphorylation, and consequently in Sp1 activation, we inhibited adduct formation by pretreating HSCs with 100  $\mu$ M P5P or 4  $\mu$ M pHMB 60 min prior to the addition of 100 ng/ml leptin. As shown in Fig. 6F, these inhibitors, as well as glutathione and apocynin, prevented the leptin-induced phosphorylation of ERK1/2.

To confirm that NADPH oxidase mediated the effects of leptin on *Col1a(I)* gene expression, we first measured the effects of 100 ng/ml leptin on NADPH oxidase gene expression. As Fig. 7A shows, leptin induced gene expression of several components of the NADPH oxidase, particularly of NOX2 and RAC1. The effects of leptin on *p22<sup>phox</sup>* and *p47<sup>phox</sup>* gene expression were less pronounced and appeared later, at 12 h. The critical role of NADPH oxidase on *Col1a(I)* gene expression was corroborated by showing that silencing NOX2, RAC1, or *p47<sup>phox</sup>*, three components of the NADPH oxidase complex, with appropriated small interfering RNAs (siRNAs) suppressed completely leptin-induced *Col1a(I)* gene expression (Fig. 7B). Moreover, silencing NOX2 or RAC1 also resulted in an absence of Sp1, Sp3, and ERK1/2 phosphorylation by leptin (Fig. 7C) and prevented the effects of this hormone on the binding of nuclear proteins to FP2 (Fig. 7D) and FP3 (Fig. 7E) <sup>32</sup>P-radiolabeled oligonucleotides. Likewise, silencing ERK1 or ERK2 had similar effects on the binding of these proteins to FP2 and FP3 (Fig. 7, D and E).

## Discussion

There is some controversy concerning the expression of OB-Rb leptin receptor in HSCs. Although some authors were not able to detect the long form of leptin receptors in HSCs (5, 23), others have demonstrated that the expression of this receptor increase progressively as the cells be-

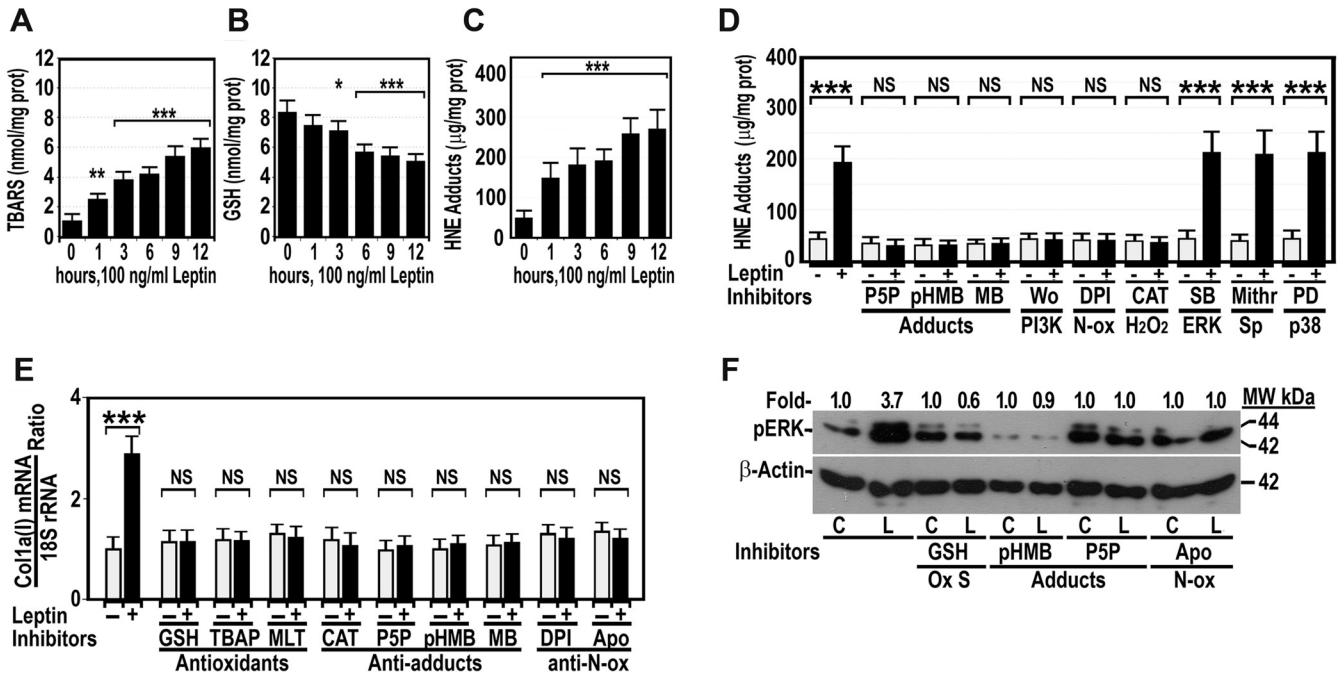

**FIG. 6.** Leptin produces oxidative stress and stimulates *Col1a(I)* gene expression by activating NADPH oxidase and through the formation of aldehyde-protein adducts. A–C, Effects of 100 ng/ml leptin on the content in TBARS (A), reduced glutathione (B), and aldehyde-protein adducts (C) in cultured HSCs. TBARS, reduced glutathione, and adducts were measured as indicated under *Materials and Methods*. These results are representative of three separate experiments that were done in quintuplicate. Data are shown as mean ± SD. \*,  $P < 0.05$ ; \*\*,  $P < 0.01$ ; \*\*\*,  $P < 0.001$ . D, Effects of 100  $\mu$ M P5P, 4  $\mu$ M pHMB, 10  $\mu$ M methylene blue (MB), 0.1  $\mu$ M wortmannin (Wo), 10  $\mu$ M DPI, 1000 U/ml CAT, 1  $\mu$ M SB203580 (SB), 0.1  $\mu$ M mithramycin (Mithr), or 25  $\mu$ M PD098059 on the cellular content in aldehyde-protein adducts in the absence (–) or presence (+) of 100 ng/ml leptin for 6 h. Inhibitors were added to the cells 60 min before leptin. These results are representative of two separate experiments that were done in triplicate. Data are shown as mean ± SD. \*\*\*,  $P < 0.001$ . NS, Not significant. E, Effects of 100 ng/ml leptin on the *Col1a(I)* gene expression [*Col1a(I)* mRNA to 18S rRNA ratio (RT-PCR)] in the presence or absence of antioxidants [2 mM glutathione ethyl ester (GSH); 5,10,15,20-tetrakis (4-benzoic acid) porphyrin (TBAP); melatonin (MLT), CAT], blockers of aldehyde-protein adducts formation [P5P; pHMB; methylene blue (MB)], and inhibitors of the NADPH oxidase [DPI; apocynin (Apo)]. Inhibitors were added to the cells as indicated in panel D. \*\*\*,  $P < 0.001$ . NS, Not significant. F, Effects of glutathione ethyl ester (GSH), inhibitors of aldehyde-protein adduct formation (pHMB; P5P), or blockers of the NADPH oxidase (N-ox) (Apo) on the leptin-induced ERK1/2 phosphorylation (pERK). Ox S, Oxidative stress (Western blot using antibody against phosphorylated ERK or  $\beta$ -actin as loading control).

come activated (4). We confirm latter results and show that, at the time the experiments were performed, OB-Rb receptors were fully expressed in HSCs (Fig. 1A).

In the present study, we show that leptin stimulates *Col1a(I)* gene expression and collagen I protein production in primary culture of HSCs (Fig. 1, B–D), reaching its maximal effect with 100 ng/ml at 12 h. These results concur with those reported by others, who also found that leptin increased transcriptional activation of *Col1a(I)* gene in HSCs (4, 7, 8, 30).

Mechanisms of these effects are not completely understood. However, the increase in procollagen mRNA levels induced by leptin was blocked by inhibiting protein synthesis (Fig. 1E), indicating that the *de novo* synthesis of a protein may be required for this effect. Some authors have suggested that leptin up-regulates collagen synthesis by increasing TGF $\beta$ 1 production from Kupffer and other cells, including HSCs (5, 23). Our study performed in a HSC population 98% pure (14), with less than 2% positive for Kupffer cell markers, shows that leptin at the dose

used in our experiments (100 ng/ml) did not increase significantly TGF $\beta$ 1 gene expression (Fig. 1F). These results concur with those reported by others (4, 7), who also showed that leptin did not change significantly TGF $\beta$ 1 mRNA in HSC-T6 cells and primary cultures of HSCs. Moreover, Saxena *et al.* (7) found that anti-TGF $\beta$ 1 antibody failed to prevent the effects of leptin on collagen- $\alpha$ 2(I) gene and Cao *et al.* (8) have shown that leptin up-regulated the *Col1a(I)* gene expression in LX-2 human HSCs lacking Kupffer cell contamination. All these studies indicate that the effects of leptin on collagen gene expression are direct and, in primary cultures of HSCs, are not mediated by TGF $\beta$ 1. Nevertheless, there are evidences showing that leptin and TGF $\beta$ 1 share some intracellular signaling pathways and that a cross talk between signaling of both factors does exist (31–33).

The regulatory elements involved in the leptin-induced activation of *Col1a(I)* gene expression are unknown. To our knowledge, no study has been published approaching this issue. Extensive studies of the *Col1a(I)* gene promoter



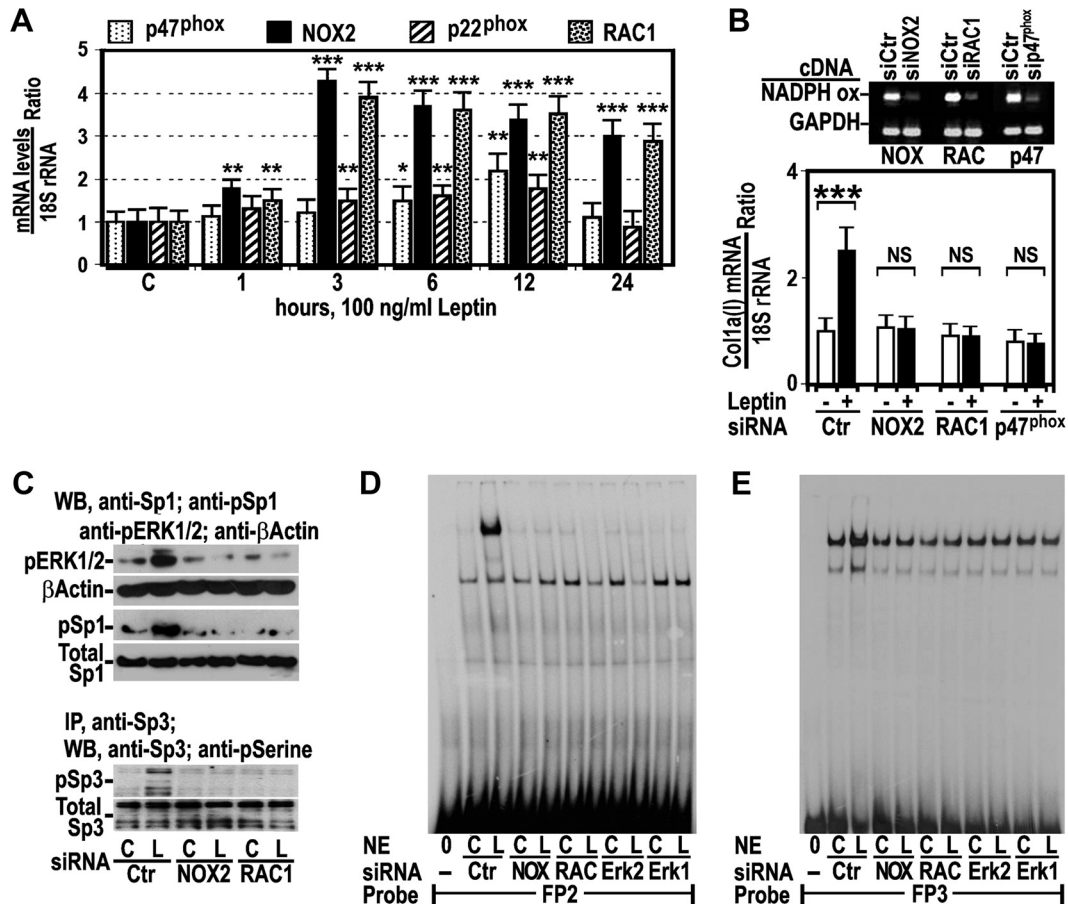

**FIG. 7.** NADPH oxidase mediates the effects of leptin on *Col1a(I)* gene expression, ERK1/2, and Sp1/Sp3 phosphorylation and the binding of nuclear proteins to *Col1a(I)* promoter. **A**, Leptin up-regulates gene expression of several components (p47<sup>phox</sup>; p22<sup>phox</sup>; NOX2; RAC1) of the NADPH oxidase [mRNA levels to 18S rRNA ratio (RT-PCR)]. a,  $P < 0.05$ ; b,  $P < 0.01$ ; c,  $P < 0.001$ . All experiments were done in quintuplicate. Data are shown as mean  $\pm$  SD. **B**, Silencing NOX2, RAC1, or p47<sup>phox</sup>, three components of the NADPH oxidase complex (NADPH ox), with appropriated siRNAs, blocked the up-regulating effects of leptin on *Col1a(I)* gene expression [*Col1a(I)* mRNA to 18S rRNA ratio (RT-PCR)]. The panel also shows RT-PCR-amplified cDNA fragments corresponding to NOX1, RAC2, p47<sup>phox</sup>, and GAPDH. Expression of these genes was decreased by about 80% in cells with silenced genes. **C**, Effects of leptin on ERK1/2, Sp1, and Sp3 serine phosphorylation in control cells (Ctr) and cells with silenced NOX2 or RAC1. Phospho-ERK1/2 (pERK1/2) and phospho-Sp1 (pSp1) were measured after 2 h of treatment with 100 ng/ml leptin. Phospho-Sp3 (pSp3) was measured after 4 h of treatment with leptin. Total Sp1, phospho-Sp1, and phospho-ERK1/2 (pERK1/2) were analyzed by Western blotting using specific anti-Sp1, antiphosphorylated Sp1, anti-pERK1/2 antibody, and  $\beta$ -actin. Phospho-Sp3 was analyzed after immunoprecipitating cellular proteins with anti-Sp3 antibody and Western blotting proteins with anti-Sp3 and antiphosphoserine (p-Serine). IP, Immunoprecipitation. WB, Western blot. **D** and **E**, Gel retardation assays showing the effects of silencing NOX2, RAC1, ERK1, or ERK2 on the leptin-induced binding of nuclear proteins to FP2 (**D**) or FP3 (**E**). The binding of nuclear proteins to FP2 or FP3 was analyzed after 8 or 12 h, respectively, of treatment of cells with 100 ng/ml leptin. NE, Nuclear proteins; C, control, untreated cells; L, cells treated with leptin; siRNA Ctr, nonspecific control RNA.

have identified several *cis*-acting regulatory elements. Our study indicates that the leptin-induced activation of the *Col1a(I)* gene must be mediated through elements located between nucleotide  $-220$  and  $-111$  of its promoter (Fig. 2). The segment of the *Col1a(I)* promoter located between  $-220$  and  $-82$  bp contains four regions protected from DNase I digestion by nuclear proteins (13, 24–26, 34) named, following that of Brenner and colleagues (26, 35), FP1 through FP4. DNA mobility shift assays using as probe oligonucleotides containing sequences corresponding to these four protected regions showed that treatment of cells with leptin increased the binding of nuclear proteins to oligonucleotides containing FP2 or FP3 sequences

but not to FP1 or FP4 oligonucleotides (Fig. 3). These results suggest that leptin increases *Col1a(I)* gene expression acting on these two *cis* regulatory elements.

The FP2 sequence contains a reverse CCAAT box motif and a 12-bp GC-rich repeat (24, 26), to which bind, at least in NIH 3T3 fibroblasts, NF1 and Sp1, respectively (26). As in previous studies (11, 12), we show that Sp1 is involved in the formation of the upper DNA-protein complex observed after incubating nuclear proteins from HSCs with FP2 oligonucleotide and that leptin increases the formation of this complex (Fig. 3B). On the contrary, we were not able to demonstrate the presence of NF1 in any of the two DNA-protein complexes formed after in-

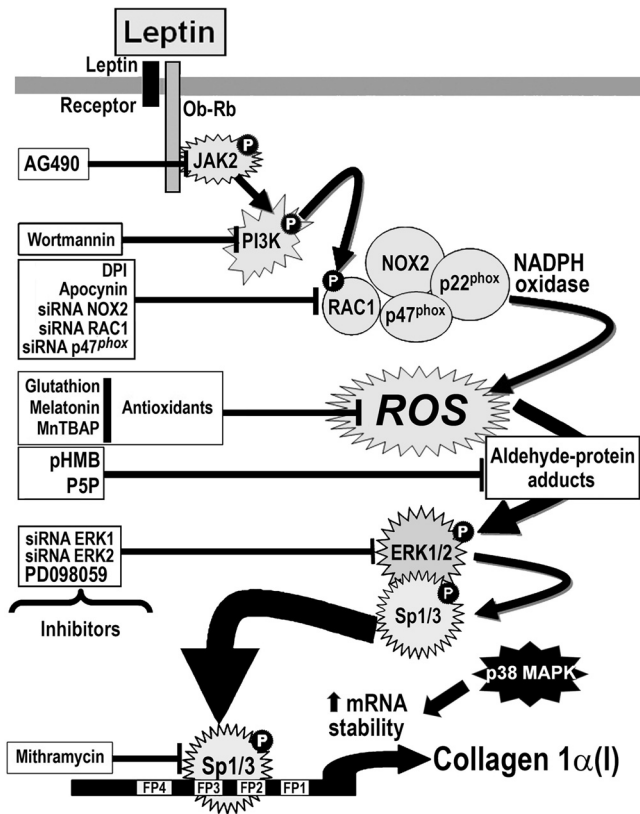

**FIG. 8.** Schematic diagram for leptin-induced collagen  $\alpha 1(I)$  gene expression in hepatic stellate cells. Leptin binds to the long form of the leptin receptor (ObRb) leading to JAK2 phosphorylation. Activated JAK2, mediated by PI3K, phosphorylates RAC1 and consequently activates the nonphagocytic NADPH oxidase complex, which in turn increases the production of reactive oxygen species (ROS). In addition, leptin increases gene expression of several components of this oxidase complex. Oxidative stress caused by the NADPH oxidase activity results in the formation of aldehyde-protein adducts, which induce ERK1/2 phosphorylation. These kinases phosphorylate Sp1/Sp3 and determines their nuclear translocation and their binding to the collagen  $\alpha 1(I)$  promoter.

cubating nuclear proteins with FP2 oligonucleotide. Likewise, supershift assays using specific antibody against AP2 or Zf9, two GC-rich binding proteins, did not demonstrate the interaction of these nuclear factors with FP2 (Fig. 3B). On the contrary, supershift assay using Sp3 antibody demonstrated that this nuclear factor is implicated in the formation of the lower complex (Fig. 3B). The leptin-induced interaction of Sp proteins with FP2 has a functional role on the increased expression of *Coll1a(I)* gene as indicated by the absence of the leptin effect on cells transfected with ColCAT plasmids containing mutations at FP2 (Supplemental Fig. 1) or by treating cells with mithramycin (Figs. 4, B and C), a drug that interferes with the binding of Sp proteins to DNA (Fig. 4A) (27).

The FP3 is a pyrimidine-rich region that contains TCCCCC and TCCTCC motifs between nucleotide –161 and –149 of the noncoding strand of the *Coll1a(I)* promoter. In fibroblasts, these motifs have been shown to be

binding sites for transcription factors c-Krox (36, 37), Sp1, and Sp3 (38). In the present study, we were not able to demonstrate that leptin increases the interaction of c-Krox with FP3. However, as Fig. 3C shows, leptin increased clearly the binding of Sp1 and Sp3 to this region of the *Coll1a(I)* promoter.

Leptin may intensify the binding of Sp proteins to *Coll1a(I)* gene promoter either by increasing the amount of Sp proteins or by inducing their phosphorylation (28). In the present study, we show that leptin increases Sp1 and Sp3 protein expression (Fig. 4, E and F), but these effects occur later, after having induced the binding of Sp1 to the *Coll1a(I)* promoter and the expression of *Coll1a(I)* gene (Figs. 1, B and D, and 3, B and C). However, leptin-induced serine phosphorylation of Sp1 and Sp3 occurred as early as 2 and 4 h, respectively, which may be responsible for the enhanced binding to FP2 and FP3 and for the activation of *Coll1a(I)* gene expression observed in leptin-treated cells. Although both transcription factors, Sp1 and Sp3, recognize the same GC-rich repeats (39), they do not act competitively on *Coll1a(I)* gene as it has been clearly demonstrated by a number of authors (40–42), likely because Sp1 forms a complex with Sp3 and both factors work cooperatively in up-regulating *Coll1a(I)* gene (40). Moreover, although Sp1 is phosphorylated at h 2, Sp3 is activated later mainly at h 4 (Fig. 4, E and F). The involvement of phosphorylated Sp1 in the activation of *Coll1a(I)* promoter is not specific for leptin because we have previously shown that malondialdehyde and iron-containing solutions increase *Coll1a(I)* gene expression using a similar mechanism of action (11, 12).

Although Sp1 phosphorylation seems to be necessary to stimulate *Coll1a(I)* promoter, the specific pathways used by leptin for activating Sp1/Sp3 and consequently for increasing *Coll1a(I)* gene expression are unknown. Our study shows that leptin-induced Sp1 phosphorylation was prevented by inhibiting JAK2, PI3K, nonphagocytic NADPH oxidase, and ERK1/2, suggesting that these enzymes are implicated in the activation of this transcriptional factor (Fig. 5A). Moreover, inhibiting these enzymes also prevented the up-regulating effects of leptin on *Coll1a(I)* gene expression. Our study also shows that inhibition of p38-MAPK prevents leptin-induced up-regulation of *Coll1a(I)* gene expression without suppressing ERK1/2 and Sp1 phosphorylation (Fig. 5). This effect may be attributed to the fact that p38-MAPK acts posttranscriptionally by increasing *Coll1a(I)* mRNA stability (8).

In the present study, we also show that leptin induces oxidative stress as indicated by the significant increase in TBARS concentration, by the decrease in reduced glutathione in HSCs exposed to leptin, and by the increased formation of aldehyde-protein adducts (Fig. 6, A–C). The

latter effect of leptin is mediated by H<sub>2</sub>O<sub>2</sub>, PI3K, and NADPH oxidase because pretreating cells with catalase or with inhibitors of these two enzymes prevented adduct formation (Fig. 6D). The leptin-induced oxidative stress plays a role in the increased expression of *Col1a(I)* gene because the use of four different antioxidants abrogated this effect of leptin (Fig. 6E). In previous studies, we have already demonstrated that oxidative stress stimulates *Col1a(I)* gene expression, like leptin, by inducing the binding of Sp1/Sp3 to elements located between –161 and –110 bp of the *Col1a(I)* promoter (11, 12). In these and other studies (29), we presented evidence supporting the role played by the aldehyde-protein adducts formed as a consequence of lipid peroxidation in the stimulation of *Col1a(I)* gene expression, seeing that oxidative stress increases adduct formation (29) and P5P, pHMB, and methylene blue, agents known to inhibit aldehyde-protein adducts formation (43), abolished the stimulatory effect of iron salts and malondialdehyde on *Col1a(I)* mRNA levels (11, 12). In the present study, we show that leptin shares the same final mechanism to stimulate *Col1a(I)* gene expression because blocking aldehyde-protein adduct formations also results in the abrogation of these effects (Fig. 6E).

The leptin-induced oxidative stress has been ascribed to the nonphagocytic NADPH oxidase (10), which in turn would activate ERK1/2. In the present study, we provide evidence supporting this mechanism of action because inhibition of this oxidase with DPI or apocynin or by silencing gene expression of its components abolished ERK1/2 (Figs. 5C, 6F, and 7C) and Sp1 (Figs. 5A and 7C) phosphorylation and *Col1a(I)* gene expression (Figs. 5B, 6E, and 7B). Moreover, our study shows that leptin increases gene expression of some components of NADPH oxidase, particularly the expression of NOX2, a membrane-bound component of the catalytic unit of this complex, and the cytosolic RAC1 (Fig. 7A), which activity is crucial for NADPH oxidase function in HSCs (44). These effects of leptin occur early; therefore, the blocking effects exerted by cycloheximide on the effects of leptin (Fig. 1E) may be explained by blocking the synthesis of these components of the NADPH oxidase. ERK1/2-dependent activation of Sp1 that we have observed in the present study might be a consequence of the oxidative stress provoked by leptin. Mechanisms of ERK1/2 activation by the oxidative stress may be ascribed to the effects of aldehyde-protein adducts on ERK1/2 phosphorylation (45) because inhibitors of adduct formation prevented ERK1/2 phosphorylation (Fig. 6F). The inhibitory effects of wortmannin on Sp1 and ERK1/2 activation and leptin-induced *Col1a(I)* gene expression (Fig. 5) may be ascribed to the role played by PI3K in the phosphorylation of RAC1, a component required

for NADPH oxidase function (46, 47). Finally, phosphorylated ERK1/2-dependent activation of Sp1 is supported by the fact that phosphorylated ERK interacts with Sp1 and both bind collagen promoter (31).

We conclude that, in HSCs, leptin up-regulates *Col1a(I)* gene expression after activating NADPH oxidase, inducing oxidative stress, aldehyde-protein adduct formation, and ERK1/2 phosphorylation, which in turn activates Sp1/Sp3 and provokes the binding of these two factors to regulatory elements located between –161 and –110 bp of the *Col1a(I)* promoter (Fig. 8).

## Acknowledgments

Address all correspondence and requests for reprints to: José A. Solís-Herruzo, Ph.D., M.D., Centro de Investigación, Hospital “12 de Octubre,” Carretera de Andalucía, Km 5.400, 28041 Madrid, Spain. E-mail: jsolis.hdoc@salud.madrid.org.

This work was supported in part by Grants AP2884-2008, AP7257-2010, and AP8540-2011 from the “Fundación Mutua Madrileña” and Grants PI07/0052, PI10/0312 from the “Fondo de Investigación Sanitaria” (Spain).

Disclosure Summary: The authors have nothing to disclose.

## References

1. Friedman JM, Halaas JL 1998 Leptin and the regulation of body weight in mammals. *Nature* 395:763–770
2. Pelleymounter MA, Cullen MJ, Baker MB, Hecht R, Winters D, Boone T, Collins F 1995 Effects of the obese gene product on body weight regulation in ob/ob mice. *Science* 269:540–543
3. Huang L, Li C 2000 Leptin: a multifunctional hormone. *Cell Res* 10:81–92
4. Saxena NK, Ikeda K, Rockey DC, Friedman SL, Anania FA 2002 Leptin in hepatic fibrosis: evidence for increased collagen production in stellate cells and lean littermates of ob/ob mice. *Hepatology* 35:762–771
5. Ikejima K, Takei Y, Honda H, Hirose M, Yoshikawa M, Zhang YJ, Lang T, Fukuda T, Yamashina S, Kitamura T, Sato N 2002 Leptin receptor-mediated signaling regulates hepatic fibrogenesis and remodeling of extracellular matrix in the rat. *Gastroenterology* 122:1399–1410
6. Honda H, Ikejima K, Hirose M, Yoshikawa M, Lang T, Enomoto N, Kitamura T, Takei Y, Sato N 2002 Leptin is required for fibrogenic responses induced by thioacetamide in the murine liver. *Hepatology* 36:12–21
7. Saxena NK, Saliba G, Floyd JJ, Anania FA 2003 Leptin induces increased  $\alpha$ 2(I) collagen gene expression in cultured rat hepatic stellate cells. *J Cell Biochem* 89:311–320
8. Cao Q, Mak KM, Lieber CS 2006 Leptin enhances  $\alpha$ 1(I) collagen gene expression in LX-2 human hepatic stellate cells through JAK-mediated H<sub>2</sub>O<sub>2</sub>-dependent MAPK pathways. *J Cell Biochem* 97:188–197
9. Sweeney G 2002 Leptin signalling. *Cell Signal* 14:655–663
10. De Minicis S, Seki E, Oesterreicher C, Schnabl B, Schwabe RF, Brenner DA 2008 Reduced nicotinamide adenine dinucleotide phosphate oxidase mediates fibrotic and inflammatory effects of leptin on hepatic stellate cells. *Hepatology* 48:2016–2026

11. García-Ruiz I, de la Torre P, Díaz T, Esteban E, Morillas JD, Muñoz-Yagüe T, Solís-Herruzo JA 2000 Sp family of transcription factors is involved in iron-induced collagen alpha 1(I) gene expression. *DNA Cell Biol* 19:167–178
12. García-Ruiz I, de la Torre P, Díaz T, Esteban E, Fernández I, Muñoz-Yagüe T, Solís-Herruzo JA 2002 Sp1 and Sp3 transcription factors mediate malondialdehyde-Induced collagen  $\alpha$ 1(I) gene expression in cultured hepatic stellate cells. *J Biol Chem* 277:30551–30558
13. Rippe RA, Almounajed G, Brenner DA 1995 Sp1 binding activity increases in activated Ito cells. *Hepatology* 22:241–251
14. Díaz-Sanjuán T, García-Ruiz I, Rodríguez-Juan C, Muñoz-Yagüe T, Solís-Muñoz P, Solís-Herruzo JA 2009 Interferon  $\alpha$  increases metalloproteinase-13 gene expression through a polyomavirus enhancer activator 3-dependent pathway in hepatic stellate cells. *J Hepatol* 50:128–139
15. García-Ruiz I, Fernández-Moreira D, Solís-Muñoz P, Rodríguez-Juan C, Díaz-Sanjuán T, Muñoz-Yagüe T, Solís-Herruzo JA 2010 Mitochondrial complex I subunits are decreased in murine nonalcoholic fatty liver disease: Implication of peroxynitrite. *J Proteome Res* 9:2450–2459
16. Lang A, Schrum LW, Schoonhoven R, Tuvia S, Solís-Herruzo JA, Tsukamoto H, Brenner DA, Rippe RA 2000 Expression of small heat shock protein  $\alpha$ B-crystallin is induced after hepatic stellate cell activation. *Am J Physiol* 279:G1333–G1342
17. Solís-Herruzo JA, Rippe RA, Schrum LW, de la Torre P, García I, Jeffrey JJ, Muñoz-Yagüe T, Brenner DA 1999 Interleukin-6 increases rat metalloproteinase-13 gene expression through stimulation of activator protein 1 transcription factor in cultured fibroblasts. *J Biol Chem* 274:30919–30926
18. Rippe RA, Brenner DA, Leffert HL 1990 DNA-mediated gene transfer into adult rat hepatocytes in primary culture. *Mol Cell Biol* 10:689–695
19. Solís-Herruzo JA, Hernández I, De la Torre P, García I, Sánchez JA, Fernández I, Castellano G, Muñoz-Yagüe T 1998 G proteins are involved in the suppression of collagen  $\alpha$ 1(I) gene expression in cultured rat hepatic stellate cells. *Cell Signal* 10:173–183
20. Bradford MM 1976 A rapid and sensitive method for the quantitation of microgram quantities of protein utilizing the principle of protein-dye binding. *Anal Biochem* 72:248–254
21. Hall CV, Jacob PE, Ringold GM, Lee F 1983 Expression and regulation of *Escherichia coli* lacZ gene fusions in mammalian cells. *J Mol Appl Gen* 2:101–109
22. Eady JJ, Orga T, Dennis MF, Stratford MR, Peacock JH 1995 Glutathione determination by Tietze enzymatic recycling assay and its relationship to cellular radiation response. *Br J Cancer* 72:1089–1095
23. Wang J, Leclercq I, Brymora JM, Xu N, Ramezani-Moghadam M, London RM, Brigstock D, George J 2009 Kupffer cells mediate leptin-induced liver fibrosis. *Gastroenterology* 137:713–723
24. Rippe RA, Lorenzen SI, Brenner DA, Breindl M 1989 Regulatory elements in the 5'-flanking region and the first intron contribute to transcriptional control of the mouse  $\alpha$ 1 type I collagen gene. *Mol Cell Biol* 9:2224–2227
25. Hernández I, de la Torre P, Rey-Campos J, García I, Sánchez JA, Muñoz R, Rippe RA, Muñoz-Yagüe T, Solís-Herruzo JA 2000 Collagen  $\alpha$ 1(I) gene contains an element responsive to tumor necrosis factor- $\alpha$  located in the 5' untranslated region of its first exon. *DNA Cell Biol* 19:341–352
26. Nehls MC, Rippe RA, Veloz L, Brenner DA 1991 Transcription factors nuclear factor I and Sp1 interact with the murine collagen  $\alpha$ 1(I) promoter. *Mol Cell Biol* 11:4065–4073
27. Blume SW, Snyder RC, Ray R, Thomas S, Koller CA, Miller DM 1991 Mithramycin inhibits SP1 binding and selectively inhibits transcriptional activity of the dihydrofolate reductase gene *in vitro* and *in vivo*. *J Clin Invest* 88:1613–1621
28. Chu S, Ferro TJ 2005 Sp1: regulation of gene expression by phosphorylation. *Gene* 348:1–11
29. Chojkier M, Houghlum K, Solis-Herruzo J, Brenner DA 1989 Stimulation of collagen gene expression by ascorbic acid in cultured human fibroblasts. A role for lipid peroxidation? *J Biol Chem* 264:16957–16962
30. Choudhury J, Mirshahi F, Murthy KS, Yager DR, Sanyal AJ 2006 Physiologic concentrations of leptin increase collagen production by non-immortalized human hepatic stellate cells. *Metabolism* 55:1317–1322
31. Nieto N, Cederbaum AI 2005 S-adenosylmethionine blocks collagen I production by preventing transforming growth factor- $\beta$  induction of the COL1A2 promoter. *J Biol Chem* 280:30963–30974
32. Chen SJ, Yuan W, Lo S, Trojanowska M, Varga J 2000 Interaction of smad3 with a proximal smad-binding element of the human  $\alpha$ 2(I) procollagen gene promoter required for transcriptional activation by TGF- $\beta$ . *J Cell Physiol* 183:381–392
33. Inagaki Y, Truter S, Ramirez F 1994 Transforming growth factor- $\beta$  stimulates  $\alpha$ 2(I) collagen gene expression through a cis-acting element that contains an Sp1-binding site. *J Biol Chem* 269:14828–14834
34. Karsenty G, Park RW 1995 Regulation of type I collagen gene expression. *Int Rev Immunol* 12:177–185
35. Brenner DA, Rippe RA, Veloz L 1989 Analysis of the collagen  $\alpha$ 1(I) promoter. *Nucleic Acids Res* 17:6055–6064
36. Karsenty G, de Crombrughe B 1990 Two different negative and one positive regulatory factors interact with a short promoter segment of the  $\alpha$ 1(I) collagen gene. *J Biol Chem* 265:9934–9942
37. Galera P, Park RW, Ducy P, Mattéi MG, Karsenty G 1996 c-Krox binds to several sites in the promoter of both mouse type I collagen genes. Structure/function study and developmental expression analysis. *J Biol Chem* 271:21331–21339
38. Ihn H, Trojanowska M 1997 Sp3 is a transcriptional activator of the human  $\alpha$ 2(I) collagen genes. *Nucleic Acids Res* 25:3712–3717
39. Kingsley C, Winoto A 1992 Cloning of GT box-binding proteins: a novel Sp1 multigene family regulating T-cell receptor gene expression. *Mol Cell Biol* 12:4251–4261
40. Beauchef G, Bigot N, Kypriotou M, Renard E, Porée B, Widom R, DompMartin-Blanchere A, Oddos T, Maquart FX, Demoor M, Boumediene K, Galera P 2012 The p65 subunit of NF- $\kappa$ B inhibits COL1A(I) gene transcription in human dermal and scleroderma fibroblasts through its recruitment on promoter by protein interaction with transcriptional activators (c-Krox, Sp1, and Sp3). *J Biol Chem* 287:3462–3478
41. Ihn H, Tamaki K 2000 Increased phosphorylation of transcription factor Sp1 in scleroderma fibroblasts. *Arthritis Rheum* 43:2240–2247
42. Ihn H, LeRoy EC, Trojanowska M 1997 Oncostatin M stimulates transcription of the human  $\alpha$ 2(I) collagen gene via the Sp1/Sp3-binding site. *J Biol Chem* 272:24666–24672
43. Casini A, Galli G, Salzano R, Rotella CM, Surrenti C 1993 Acetaldehyde-protein adducts, but not lactate and pyruvate, stimulate gene transcription of collagen and fibronectin in hepatic fat-storing cells. *J Hepatol* 19:385–392
44. De Minicis S, Bataller R, Brenner DA 2006 NADPH oxidase in the liver: defensive, offensive, or fibrogenic? *Gastroenterology* 131:272–275
45. Usatyuk PV, Natarajan V 2004 Role of mitogen-activated protein kinases in 4-hydroxy-2-nonenal-induced actin remodeling and barrier function in endothelial cells. *J Biol Chem* 279:11789–11797
46. Jiang JX, Mikami K, Shah VH, Torok NJ 2008 Leptin induces phagocytosis of apoptotic bodies by hepatic stellate cells *via* a Rho GTP-ase-dependent mechanism. *Hepatology* 48:1497–1505
47. Alblas J, Honing H, de Lavalette CR, Brown MH, Dijkstra CD, van den Berg TK 2005 Signal regulatory protein  $\alpha$  ligation induces macrophage nitric oxide production through JAK/STAT- and phosphatidylinositol 3-kinase/Rac1/NAPDH oxidase/H2O2-dependent pathways. *Mol Cell Biol* 25:7181–7192
